# Supplementary material for: Process coupling of CO2reduction and 5-HMF oxidation mediated by defect-enriched layered double hydroxides
Source: Royal Society of Chemistry journal article supplement (doi:10.1039/d2dt03886b), 2023-01-01
Supplement: d2dt03886b1.pdf [file d2dt03886b1.pdf]

## Supporting Information

### Process Coupling of CO<sub>2</sub> Reduction and 5-HMF Oxidation Mediated by Defect-rich Layered Double Hydroxides

Jingjing Fan<sup>1,#</sup>, Yin Zhao<sup>1,#</sup>, Qian Wang<sup>1\*</sup>, Mingyu Gao<sup>1</sup>, Xintao Li<sup>1</sup>, Dianqing Li<sup>1,2</sup>, Junting Feng<sup>1,2,\*</sup>

1 State Key Laboratory of Chemical Resource Engineering, Beijing University of Chemical Technology, 100029, Beijing, China

2 Beijing Engineering Center for Hierarchical Catalysts, Beijing University of Chemical Technology, 100029, Beijing, China

\* Corresponding author

wq@mail.buct.edu.cn (Qian Wang); fengjt@mail.buct.edu.cn (Junting Feng)

# These authors contributed equally to this work

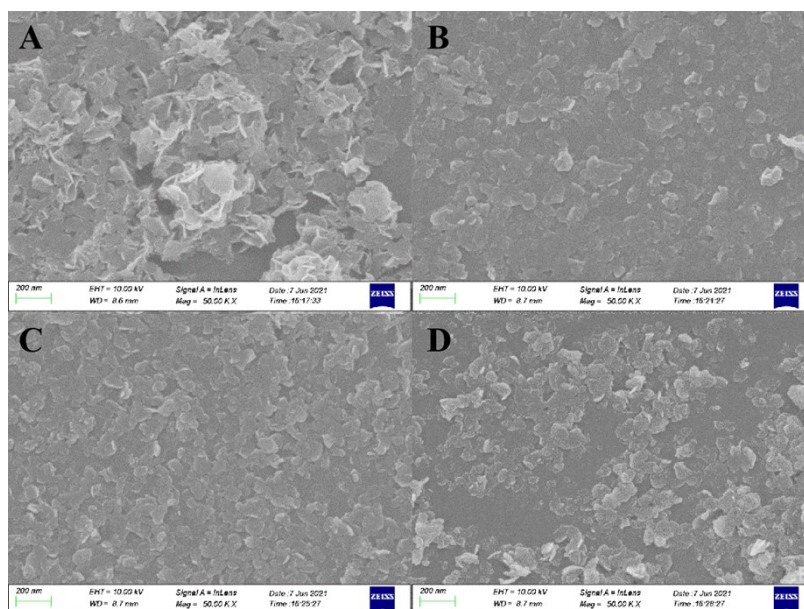

**Figure S1** SEM images of the nanoreactors (A) ZnNiFe-LDHs, (B) ZnNiFe-LDHs-E1h, (C) ZnNiFe-LDHs-E2h, (D) ZnNiFe-LDHs-E3h

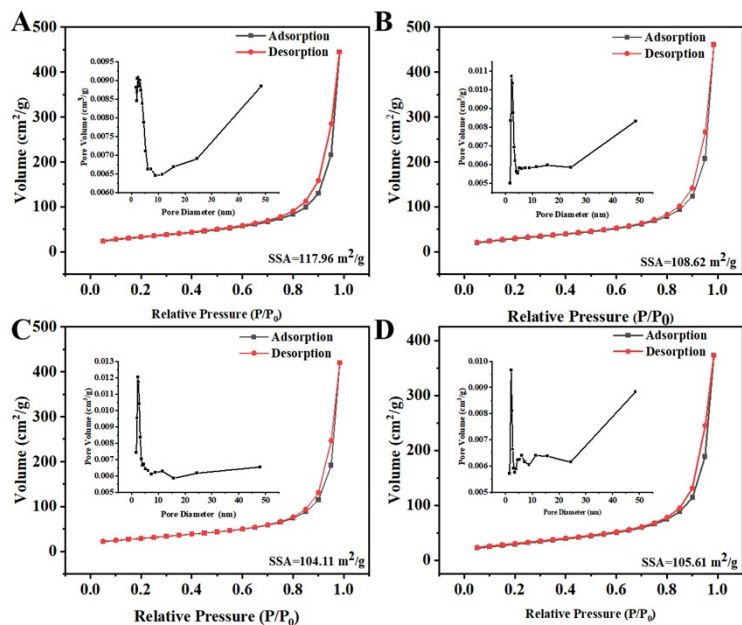

**Figure S2.** Low temperature  $N_2$  adsorption and desorption curves of nanoreactor before and after etching (A) ZnNiFe-LDHs, (B) ZnNiFe-LDHs-E1h, (C) ZnNiFe-LDHs-E2h, (D) ZnNiFe-LDHs-E3h

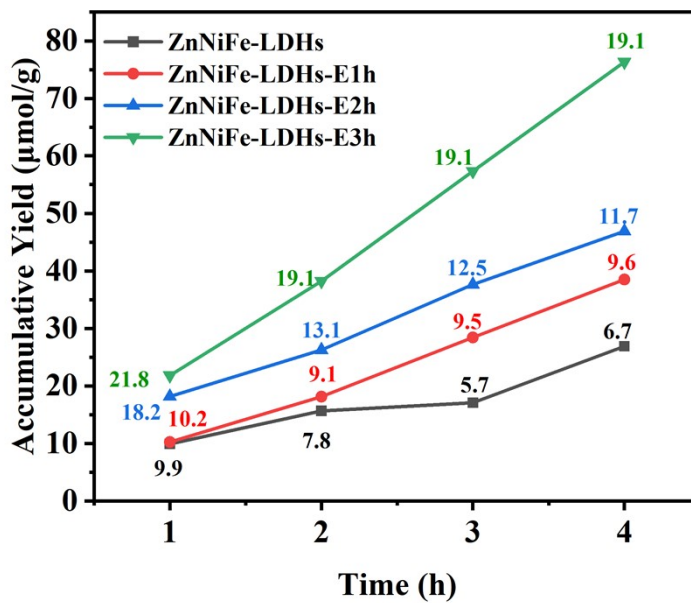

**Figure S3.** CO time performance plot

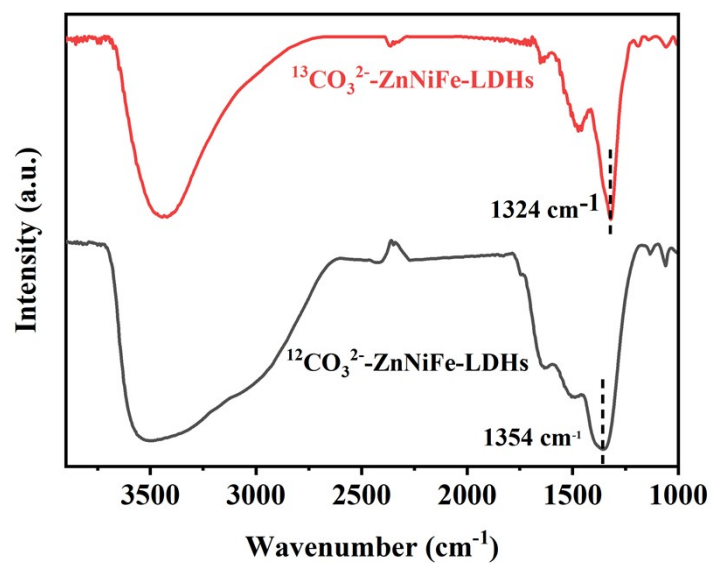

**Figure S4.** FTIR spectra of different carbon-labeled ZnNiFe-LDHs

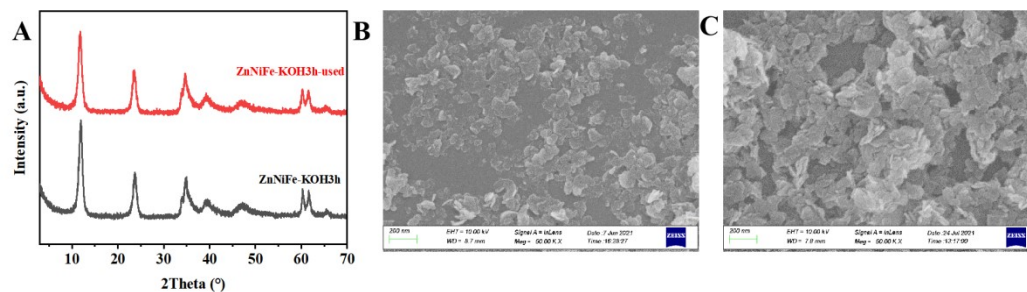

**Figure S5.** (A) XRD patterns of ZnNiFe-LDHs-E3h before and after the reaction; (B) SEM photo of ZnNiFe-LDHs-E3h before the reaction; (C) SEM photo of ZnNiFe-LDHs-E3h after the reaction

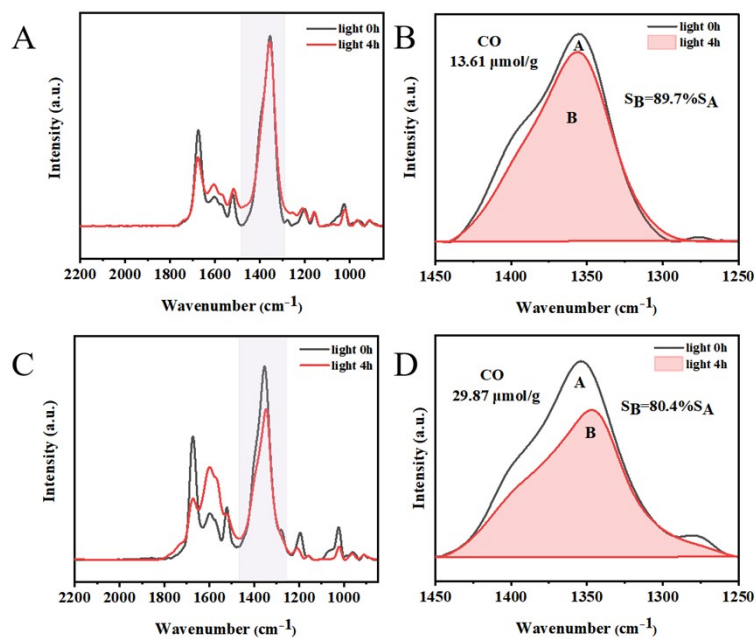

**Figure S6.** Before and after nanoreactors reaction (A) FTIR spectra of ZnNiFe-LDHs, (B) CO<sub>3</sub><sup>2-</sup> peak area comparison of ZnNiFe-LDHs, (C) FTIR spectra of ZnNiFe-LDHs-E3h, (D) CO<sub>3</sub><sup>2-</sup> peak area comparison of ZnNiFe-LDHs-E3h

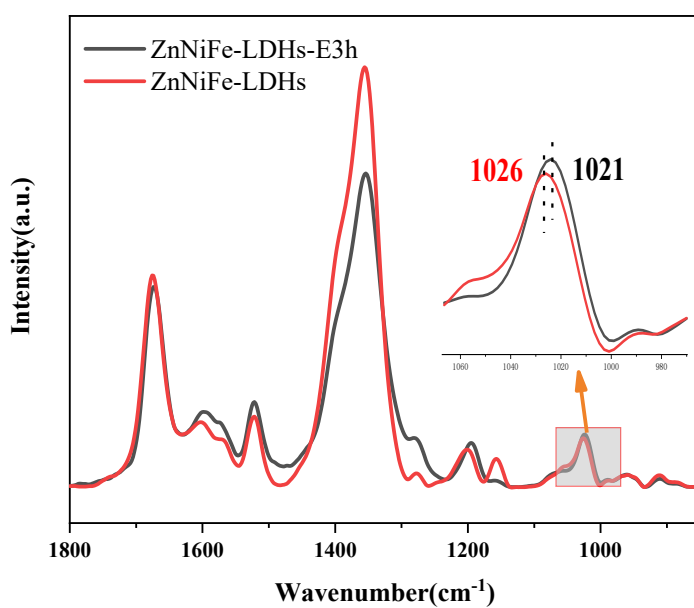

**Figure S7.** FTIR spectra of 5-HMF adsorbed by the nanoreactor

**Table S1.** Characteristic structural and size data of the LDHs determined by XRD in solid state

|                 | Peak position <sup>a</sup> (°) |      | Calculated parameters (nm)    |                  |                |                |                |
|-----------------|--------------------------------|------|-------------------------------|------------------|----------------|----------------|----------------|
|                 | 003                            | 110  | d <sub>003</sub> <sup>b</sup> | d <sub>110</sub> | a <sup>c</sup> | c <sup>d</sup> | v <sup>e</sup> |
|                 |                                |      |                               | b                |                |                |                |
| ZnNiFe-LDHs     | 11.6                           | 59.9 | 0.76                          | 0.15             | 0.31           | 2.29           | 9.8            |
| ZnNiFe-LDHs-E1h | 11.6                           | 60.0 | 0.76                          | 0.15             | 0.31           | 2.29           | 14.1           |
| ZnNiFe-LDHs-E2h | 11.6                           | 60.0 | 0.76                          | 0.15             | 0.31           | 2.29           | 14.7           |
| ZnNiFe-LDHs-E3h | 11.6                           | 60.0 | 0.76                          | 0.15             | 0.31           | 2.29           | 14.4           |

a Obtained from the XRD spectra.

b  $n\lambda = 2d\sin\theta_B$ , where n is an integer (in general it is 1),  $\lambda$  is the wavelength of the laser ( $\lambda = 0.154$  nm), d is the lattice spacing and  $\theta_B$  is the Bragg angle.

c Shortest distance between two cations in the layer and  $a = 2d_{110}$ .

d The width of a unit cell and  $c = 3d_{003}$ .

e  $v = K\lambda/\beta\cos\theta_B$ , K is the shape factor (0.89 is used in the calculation) and  $\beta$  is the line broadening at the full widths at half maximum in radian obtained by applying Gaussian fits to the peaks.

**Table S2.** The results of metal content analysis of ZnNiFe-LDHs and ZnNiFe-LDHs-EXh

| Nanoreactors    | Zn <sup>2+</sup> (mmol/g) | Ni <sup>2+</sup> (mmol/g) | Fe <sup>3+</sup> (mmol/g) | Zn:Ni:Fe    | Zn%      |
|-----------------|---------------------------|---------------------------|---------------------------|-------------|----------|
| ZnNiFe-LDHs     | 1.00±0.07                 | 3.44±0.10                 | 2.61±0.07                 | 0.38:1.31:1 | 14.2±0.5 |
| ZnNiFe-LDHs-E1h | 0.20±0.02                 | 3.49±0.06                 | 2.51±0.03                 | 0.08:1.39:1 | 3.2±0.3  |
| ZnNiFe-LDHs-E2h | 0.17±0.02                 | 3.48±0.03                 | 2.64±0.02                 | 0.06:1.31:1 | 2.7±0.3  |
| ZnNiFe-LDHs-E3h | 0.10±0.01                 | 3.73±0.02                 | 2.62±0.01                 | 0.04:1.42:1 | 1.5±0.2  |

**Table S3.** Interlayer hydroxyl and carbonate weight loss statistics

| Nanoreactors    | H <sub>2</sub> O (%) | CO <sub>3</sub> <sup>2-</sup> (%) |
|-----------------|----------------------|-----------------------------------|
| ZnNiFe-LDHs     | 15.56                | 17.03                             |
| ZnNiFe-LDHs-E1h | 14.70                | 17.05                             |
| ZnNiFe-LDHs-E2h | 13.87                | 17.45                             |
| ZnNiFe-LDHs-E3h | 11.98                | 17.00                             |

**Table S4.** 5-HMF conversion, product selectivity and photogenerated hole/electron ratio

| Nanoreactor     | 5-HMF<br>conversion(%) | Selectivity (%) |       |       | Carbon<br>balance(%) | hole/electron |
|-----------------|------------------------|-----------------|-------|-------|----------------------|---------------|
|                 |                        | DFF             | FFCA  | FDCA  |                      |               |
| ZnNiFe-LDHs     | 8.25                   | 75.41           | 15.37 | 7.57  | 98.35                | 1.24          |
| ZnNiFe-LDHs-E1h | 14.61                  | 68.14           | 17.76 | 10.97 | 96.87                | 1.32          |
| ZnNiFe-LDHs-E2h | 11.59                  | 68.11           | 20.69 | 8.55  | 97.35                | 1.27          |
| ZnNiFe-LDHs-E3h | 24.83                  | 70.73           | 15.87 | 8.61  | 95.21                | 1.31          |

**Table S5.** Comparison of the reaction conditions and performances with other catalysts for photocatalytic CO<sub>2</sub> reduction.

| Samples                                            | Light<br>Source                           | Substrate                                                                                                       | Reduced<br>Products<br>( $\mu\text{mol}\cdot\text{h}^{-1}\cdot\text{g}^{-1}$ ) | Oxidized<br>Product<br>( $\mu\text{mol}\cdot\text{h}^{-1}\cdot\text{g}^{-1}$ ) | Selectivity<br>(%)                                          | Ref.        |
|----------------------------------------------------|-------------------------------------------|-----------------------------------------------------------------------------------------------------------------|--------------------------------------------------------------------------------|--------------------------------------------------------------------------------|-------------------------------------------------------------|-------------|
| CdS/BCN                                            | 300 W Xe<br>lamp                          | CO <sub>2</sub> ,<br>H <sub>2</sub> O/CH <sub>3</sub> C<br>N;<br>TEOA                                           | CO: 250                                                                        | O <sub>2</sub>                                                                 | CO:100                                                      | 1           |
| One-Unit-<br>Cell ZnIn <sub>2</sub> S <sub>4</sub> | 300 W Xe<br>lamp (AM<br>1.5G)             | CO <sub>2</sub> , H <sub>2</sub> O                                                                              | CO: 33.2                                                                       | O <sub>2</sub>                                                                 | CO:100                                                      | 2           |
| 0.5ZIS/TiO <sub>2</sub>                            | 300 W Xe<br>lamp                          | CO <sub>2</sub> , H <sub>2</sub> O                                                                              | CO: 23.35<br>CH <sub>4</sub> : 6.19                                            | O <sub>2</sub>                                                                 | CO: 79.0                                                    | 3           |
| Co-<br>rGO/C <sub>3</sub> N <sub>4</sub>           | 300 W Xe<br>lamp ( $\lambda >$<br>420 nm) | CO <sub>2</sub> ,<br>H <sub>2</sub> O,TEOA<br>,<br>[Ru(bpy) <sub>3</sub> ]                                      | CO: 25                                                                         | O <sub>2</sub>                                                                 | CO:100                                                      | 4           |
| CuCoAl-<br>LDHs-E-60                               | 300 W Xe<br>lamp                          | Cl <sub>2</sub> ·6H <sub>2</sub> O<br>CO <sub>3</sub> <sup>2-</sup> -<br>LDHs, 5-<br>HMF,<br>CH <sub>3</sub> CN | CO:18.3                                                                        | DFF: 10.4<br>FFCA: 5.5<br>FDCA:1.7                                             | CO:>99.0<br>DFF: 59.1                                       | 5           |
| Pt/MgFe-<br>LDHs-15%                               | 300 W Xe<br>lamp                          | CO <sub>3</sub> <sup>2-</sup> -<br>LDHs,<br>glycerol                                                            | CO: 15.8<br>CH <sub>4</sub> : 43.6<br>H <sub>2</sub> :26.9                     | DHA: 147.5<br>LA: 128.2                                                        | CO: 26.6<br>CH <sub>4</sub> : 73.4<br>DHA: 53.5<br>LA: 46.5 | 6           |
| <b>ZnNiFe-</b>                                     | <b>300 W Xe</b>                           | <b>CO<sub>3</sub><sup>2-</sup>-</b>                                                                             | <b>CO: 19.1</b>                                                                | <b>DFF: 13.8</b>                                                               | <b>CO: &gt;99.0</b>                                         | <b>This</b> |

#### References:

- (1) Zhou, M.; Wang, S.; Yang, P.; Huang, C.; Wang, X. Boron Carbon Nitride Semiconductors Decorated with CdS Nanoparticles for Photocatalytic Reduction of CO<sub>2</sub>. *ACS Catalysis* **2018**, *8* (6), 4928-4936.
- (2) Jiao, X.; Chen, Z.; Li, X.; Sun, Y.; Gao, S.; Yan, W.; Wang, C.; Zhang, Q.; Lin, Y.; Luo, Y.; et al. Defect-Mediated Electron–Hole Separation in One-Unit-Cell ZnIn<sub>2</sub>S<sub>4</sub> Layers for Boosted Solar-Driven CO<sub>2</sub> Reduction. *Journal of the American Chemical Society* **2017**, *139* (22), 7586-7594.
- (3) She, H.; Wang, Y.; Zhou, H.; Li, Y.; Wang, L.; Huang, J.; Wang, Q. Preparation of Zn<sub>3</sub>In<sub>2</sub>S<sub>6</sub>/TiO<sub>2</sub> for Enhanced CO<sub>2</sub> Photocatalytic Reduction Activity Via Z-scheme Electron Transfer. *ChemCatChem* **2019**, *11* (2), 753-759.
- (4) Jiang, J.; Duan, D.; Ma, J.; Jiang, Y.; Long, R.; Gao, C.; Xiong, Y. Van der waals heterostructures by single cobalt sites-anchored graphene and g-C<sub>3</sub>N<sub>4</sub> nanosheets for photocatalytic syngas production with tunable CO/H<sub>2</sub> ratio. *Applied Catalysis B: Environmental* **2021**, *295*, 120261.
- (5) Fan, J.; Yue, X.; Liu, Y.; Li, D.; Feng, J. An integration system derived from LDHs for CO<sub>2</sub> direct capture and photocatalytic coupling reaction. *Chem Catalysis* **2022**, *2* (3), 531-549.
- (6) Gao, M.; Fan, J.; Fan, J.; Wang, Q.; Li, D.; Feng, J. Process coupling of CO<sub>2</sub> and glycerol comprehensive utilization based on anionic 2D nanomaterial. *AIChE Journal* **2022**, e17976.
